# Supplementary material
Source: Springer Nature journal article supplement (https://www.springermedizin.de/resource/supplementary/12903_2008_113_MOESM3_ESM.pdf/9517418)

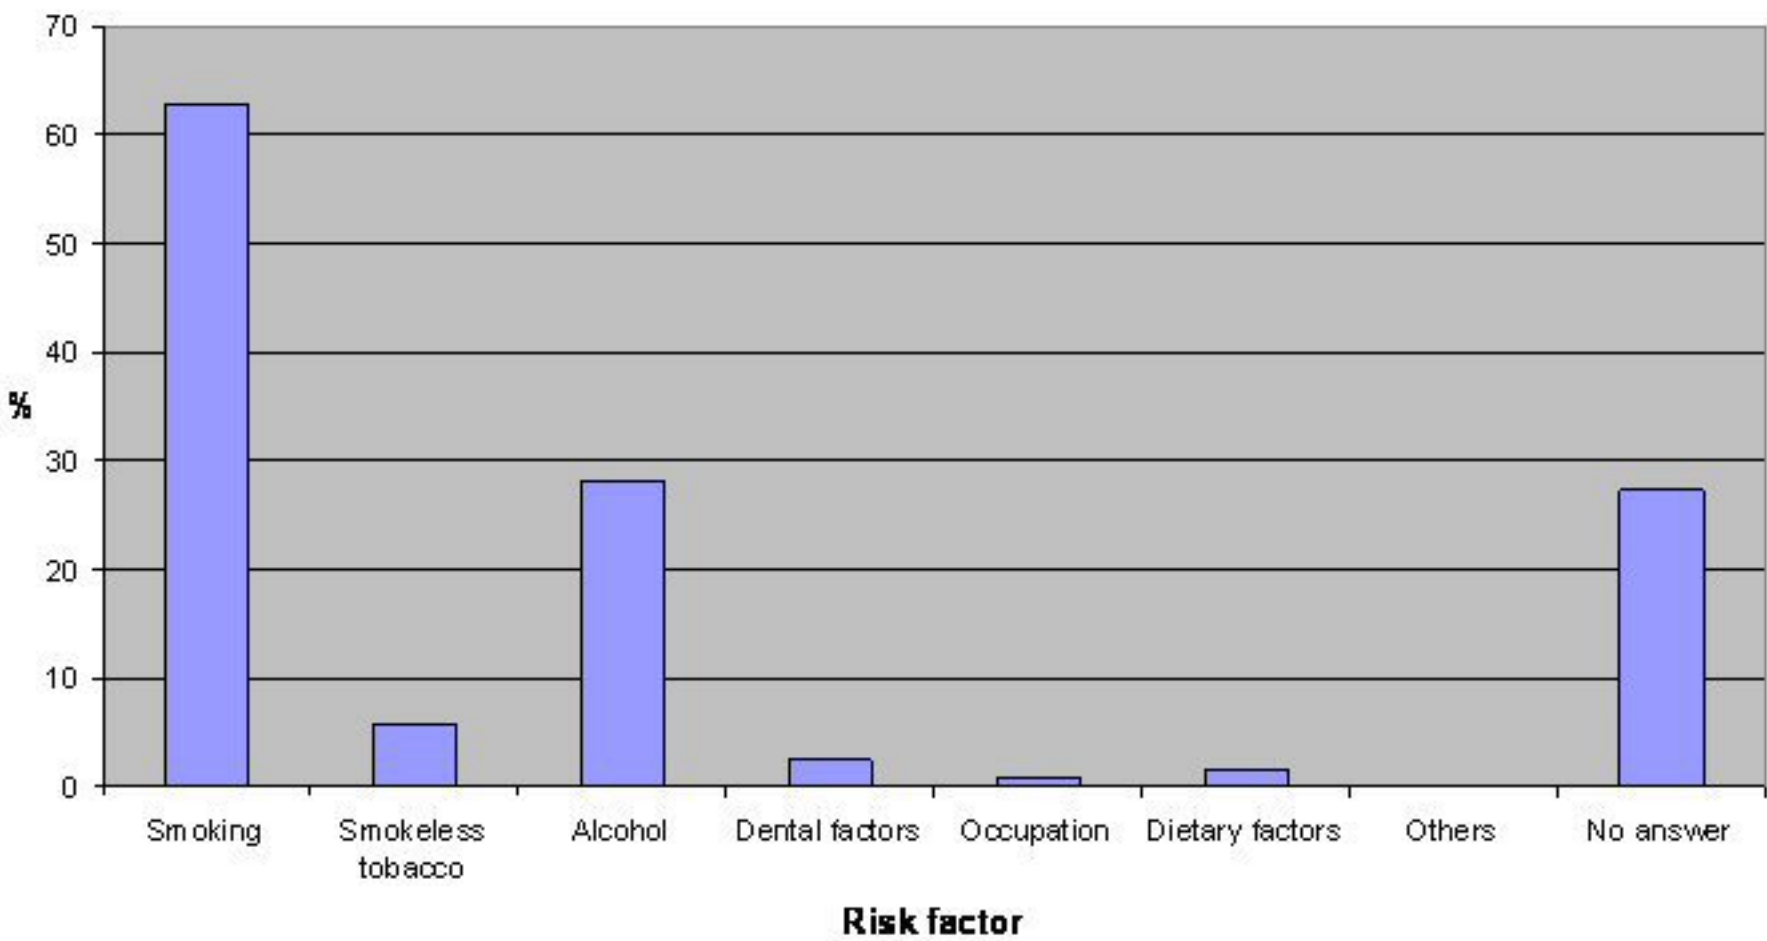

Supplement: MOESM3 [file 9517418]
